# Supplementary material
Source: PubMed Central journal article supplement (PMC7973325)
Supplement: 12250_2020_246_MOESM1_ESM.pdf [file 12250_2020_246_MOESM1_ESM.pdf]

## Electronic Supplementary Material

### Recovery and Genetic Characterization of a West Nile Virus Isolate from China

Yan Guo<sup>1</sup> • Hongjiang Wang<sup>2</sup> • Songtao Xu<sup>3,4</sup> • Hangyu Zhou<sup>5</sup> • Chao Zhou<sup>6</sup> • Shihong Fu<sup>3,4</sup> • Mengli Cheng<sup>1</sup> • Fan Li<sup>3,4</sup> • Yongqiang Deng<sup>1</sup> • Xiaofeng Li<sup>1</sup> • Huanyu Wang<sup>3,4</sup>✉ • Cheng-Feng Qin<sup>1</sup>✉

1. Department of Virology, State Key Laboratory of Pathogen and Biosecurity, Beijing Institute of Microbiology and Epidemiology, Academy of Military Medical Sciences (AMMS), Beijing 100071, China
2. PLA Strategic Support Force Characteristic Medical Center, Beijing100101, China
3. Department of Arbovirus, NHC Key Laboratory of Biosafety, National Institute for Viral Disease Control and Prevention, Chinese Center for Disease Control and Prevention, Beijing 102206, China
4. State Key Laboratory for Infectious Disease Prevention and Control, Chinese Center for Disease Control and Prevention, Beijing 102206, China
5. Suzhou Institute of System Medicine, Chinese Academy of Medical Sciences & Peking Union Medical College, Suzhou 215000, China
6. Department of Immunology, Key Laboratory of Immune Microenvironment and Disease, Nanjing Medical University, Nanjing 211166, China

Supporting information to DOI: 10.1007/s12250-020-00246-x

**Table S1.** Strains of WNV used for phylogenetic analyses.

| Accession NO. | Virus name              | Geographic origin | Year  | Abbreviation of country |
|---------------|-------------------------|-------------------|-------|-------------------------|
| AF481864      | IS-98 STD1              | Israel            | 1998  | IL                      |
| AF196835      | NY99-flamingo382-99     | USA               | 1999  | US                      |
| GQ851602      | MRM16                   | Australia         | 1960  | AU                      |
| JX123031      | V11-07                  | Australia         | 2011  | AU                      |
| KT934797      | Hu6774                  | Australia         | 1991  | AU                      |
| KP780840      | Tammy                   | Austria           | 2014  | AT                      |
| JX041628      | LEIV-72Az               | Azerbaijan        | 1970  | AZ                      |
| JX442279      | XJ11129                 | China             | 2011  | CN                      |
| KM203863      | Cz 13-502               | Czech Republic    | 2013  | CZ                      |
| AY765264      | 97-103                  | Czech Republic    | 1997  | CZ                      |
| KF179639      | Greece/2012/Kavala/39.1 | Greece            | 2012  | GR                      |
| GQ851605      | G16146                  | India             | 1957  | IN                      |
| KT163243      | 68856-ICDC-4            | India             | 2015  | IN                      |
| KC601756      | 1048813                 | India             | 3-Jul | IN                      |
| HM152775      | WNV_0304h_ISR00         | Israel            | 2000  | IL                      |
| KT207791      | 792/14                  | Italy             | 2014  | IT                      |
| JN858069      | Italy/2011/AN-1         | Italy             | 2011  | IT                      |
| KF647253      | Italy/2013/Livenza/35.1 | Italy             | 2013  | IT                      |
| FJ483549      | 15803                   | Italy             | 2008  | IT                      |
| JF719068      | Italy/2009/J-225677     | Italy             | 2009  | IT                      |
| HM147823      | No name                 | Madagascar        | 1988  | MG                      |
| GQ851607      | IBAN7019                | Nigeria           | 1965  | NG                      |
| AY277251      | LEIV-Krnd88-190         | Russia            | 1998  | RU                      |
| JX041634      | Ast-986                 | Russia            | 1999  | RU                      |
| KY703856      | ArD94343/1992/SN        | Senegal           | 1992  | SN                      |
| KY703855      | ArD96655/1993/SN        | Senegal           | 1993  | SN                      |
| KY703854      | ArD76986/1990/SN        | Senegal           | 1990  | SN                      |
| FJ766331      | GE-1b/B                 | Spain             | 2007  | ES                      |

**Table S2.** Primers for GA amplification in this study

| Primer name      | Sequence (5'-3') <sup>a</sup>                | Description |
|------------------|----------------------------------------------|-------------|
| XJ-1-4031_fwd    | AGTAGTTCGCCTGTGTGAGC                         | F1          |
| XJ-1-4031_rev    | aagcatctcaGCCCCGGAGTTAGCAGGG                 |             |
| XJ-4012-8340_fwd | actcccgggcTGAGATGCTTGAATCTGGATG              | F2          |
| XJ-4012-8340_rev | atacatctcgTGCGTGAATTCCGTGAG                  |             |
| XJ8321-11029_fwd | attccacgcaCGAGATGTATTGGGTAAGTCG              | F3          |
| XJ8321-11029_rev | atgccgacccAGATCCTGTGTTCTCGCAC                |             |
| CMV-VECTOR- fwd  | cacaggatctGGGTCGGCATGGCATCTC                 | Verctor     |
| CMV-VECTOR- rev  | gctcacacagcggaactACTGAGCTCTGCTTATATAGACCTCCC |             |

<sup>a</sup> Overlapping sequences are highlighted with capital letters

**Table S3.** Primers for sequencing.

| Name | Position    | Sequence(5'-3')                    |
|------|-------------|------------------------------------|
| F1N  | 1-29        | AGTAGTTCGCCTGTGTGAGCTGACAAACT      |
| F2N  | 841-870     | TCATGGATCTTGAGGAACCCTGGATATGCC     |
| F3N  | 1616-1640   | GGTTCATGGATCTCAACCTCCCCTG          |
| F4N  | 2434-2457   | GGAGTTCTGCTCTTCCTCTCCGTG           |
| F5N  | 3210-3237   | GGCGGGACCACGGAGCAACCACAATCGG       |
| F6N  | 4028-4054   | GCTTGAATCTGGATGTGTACAGGATCC        |
| F7N  | 4823-4850   | GTGTCAAGGAGGATCGACTTTGTTACGG       |
| F8N  | 5633-5659   | CGGATCGGGCTTGGA ACTCTGGATACG       |
| F9N  | 6435-6458   | AAAGGCGTTCAAGGACTTTGCTTC           |
| F10N | 7270-7292   | TTTTGCCACTATGCCTACATGGT            |
| F11N | 8037-8056   | TGGATGGAACATTGTCACCATGA            |
| F12N | 8857-8881   | CCCAGAATGTGCTCTCGAGAGGAAT          |
| F13N | 9669-9697   | GGCTGTCAGCGGAGATGACTGTGTGGTAA      |
| F14N | 10381-10405 | GAGGACACAGTACTGTAAATATTTT          |
| R1N  | 995-1019    | GCTCCAGATACTCCCTCTAAGAAGT          |
| R2N  | 1806-1836   | CACTCTACACTTCAAATGACCCGAAGTCAAC    |
| R3N  | 2605-2636   | CCGCACACTCCTTCCTTATGAGCTTTTTGAAT   |
| R4N  | 3418-3442   | TCTGGTAGCGCAATGGTGGTAAGGT          |
| R5N  | 4222-4248   | AGCTGTCATCACTTCAGTTGCGGGCCA        |
| R6N  | 5004-5032   | CCACTATCGGTGAGCCTGATGTTCCAGTG      |
| R7N  | 5839-5870   | GCCTTGAAGTTAGCCCCATTT CAGATATGTC   |
| R8N  | 6609-6636   | CAAGGCAATTGTCTGAAGAGCATCTGGC       |
| R9N  | 7424-7447   | GCATGATTTGTCCA ACTTTCTTCT          |
| R10N | 8213-8237   | GGGCAGAGCACCTTCACACAAAATT          |
| R11N | 9025-9052   | CCATCATGTTGTAAATGCAAGTGTGACA       |
| R12N | 9809-9836   | GTGAAATGGTTTGAGCAGAATGGAACCT       |
| R13N | 10370-10395 | CAGTACTGTGTCCTCAACCAAAGTTG         |
| R14N | 10996-11029 | AGATCCTGTGTTCTCGCACCACCAGCCACCATTG |
